# Supplementary material for: Adult Feeding Experience Determines the Fecundity and Preference of the Henosepilachna vigintioctopunctata (F.) (Coleoptera: Coccinellidae)
Source: MDPI journal article supplement (doi:10.3390/biology13040250), 2024-04-09
Supplement: s1 [file s1]

Table S1 The numbers of female and male replicates across different treatments

|        | Treatment |    |    |    |    |    |    |    |    |
|--------|-----------|----|----|----|----|----|----|----|----|
|        | PP        | PT | PE | TP | TT | TE | EP | ET | EE |
| Female | 35        | 33 | 30 | 40 | 42 | 44 | 34 | 38 | 34 |
| Male   | 32        | 33 | 36 | 45 | 41 | 41 | 39 | 30 | 38 |

The preadult survival rate of *H. vigintioctopunctata* on eggplant, tomato, and potato will dictate the number of replicates required in the match-mismatch experiments. Simultaneously, during the experiment, cases of adult escapes or accidental mortality must be documented, and the data for these adults removed.
